# Supplementary material
Source: PubMed Central journal article supplement (PMC3398135)

### Physical coverage (x haploid genomes)

11    6.4    4.9    6.9    6.7    4.4    5.9    9.1    7.6

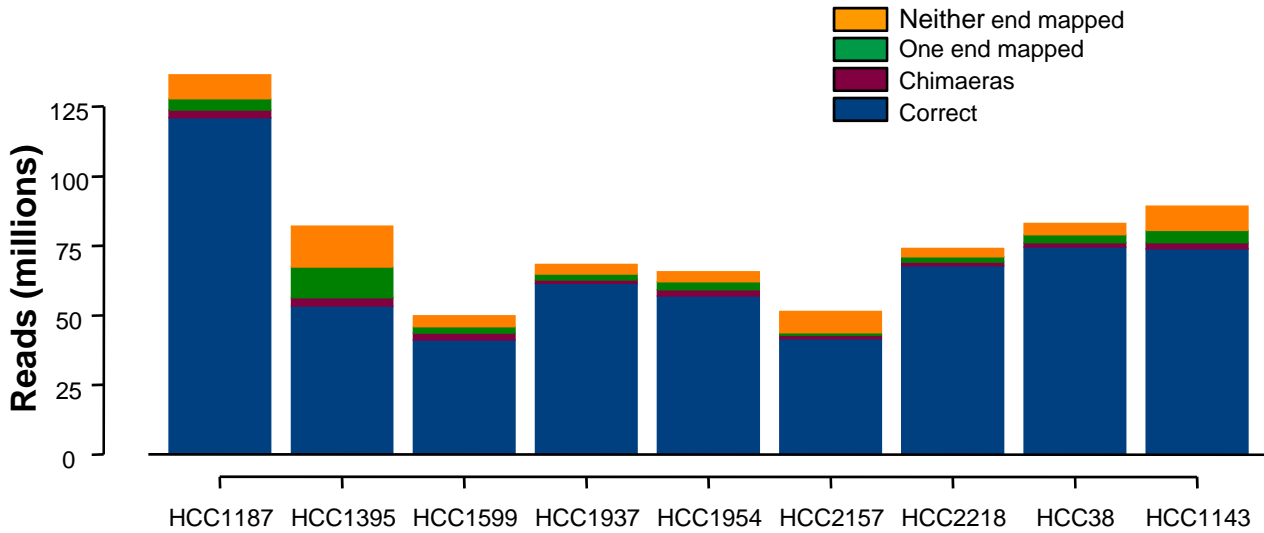

### Physical coverage (x haploid genomes)

6.4    5.7    4.2    5.7    6.3    3.8    5.3    6    11.4    7.8    6.3    4.8    6.9    6.8    6.6

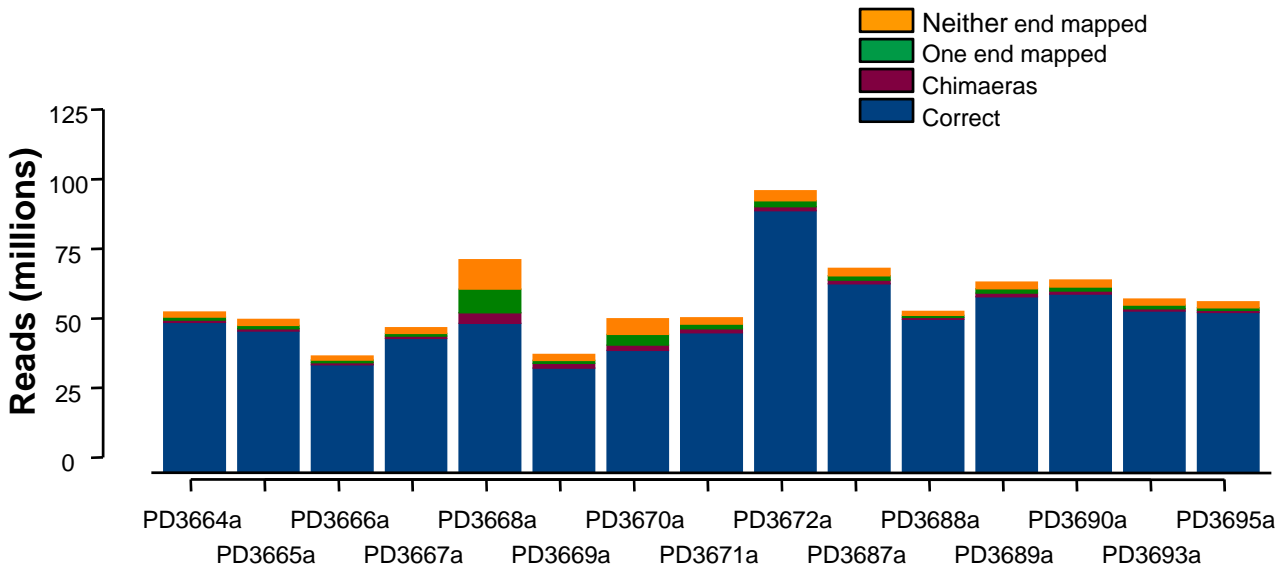

Supplement: NIHMS28075-supplement-2.pdf [file NIHMS28075-supplement-2.pdf]

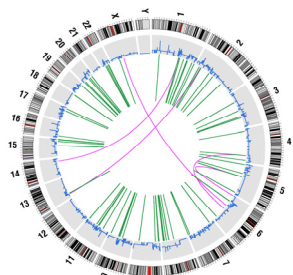

HCC2157

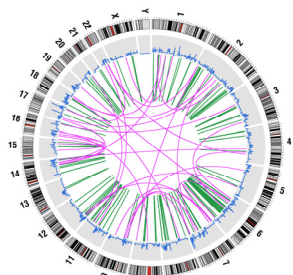

HCC1395

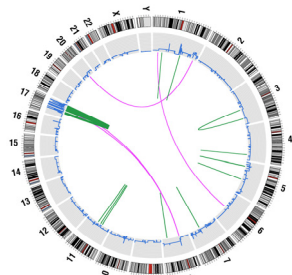

HCC2218

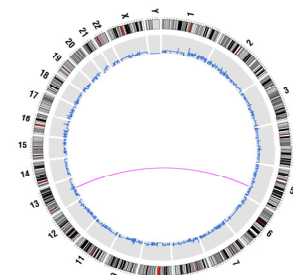

PD3667a

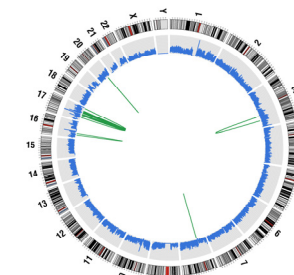

PD3671a

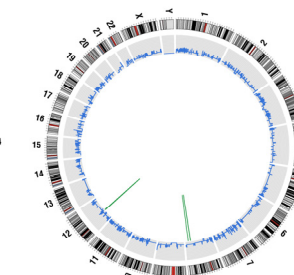

PD3689a

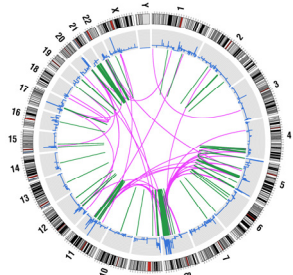

HCC1954

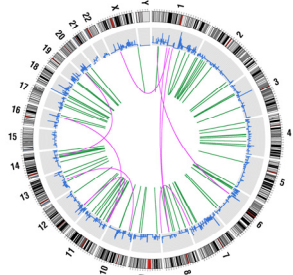

HCC1187

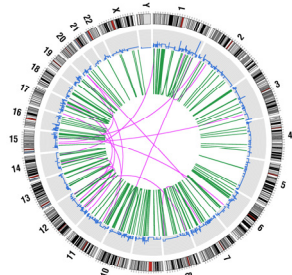

PD3664a

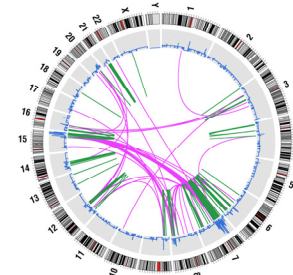

PD3668a

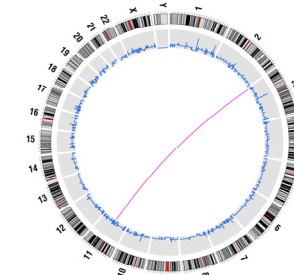

PD3672a

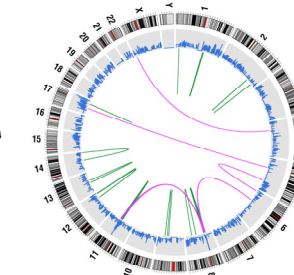

PD3690a

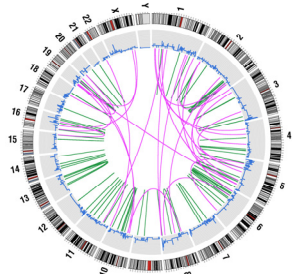

HCC1937

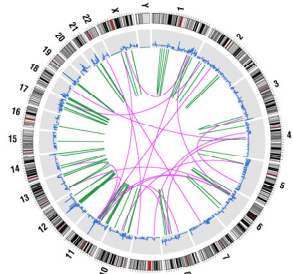

HCC1143

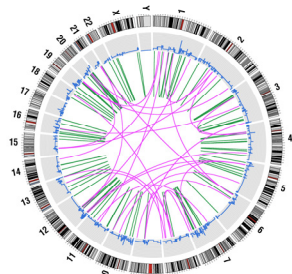

PD3665a

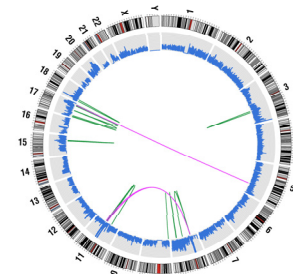

PD3669a

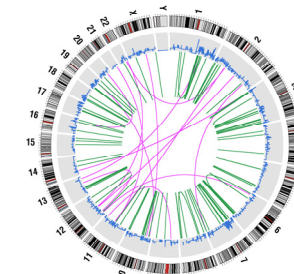

PD3687a

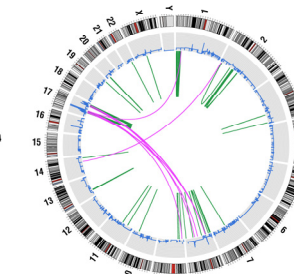

PD3693a

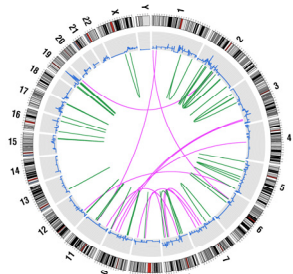

HCC1599

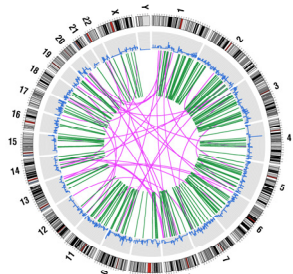

HCC38

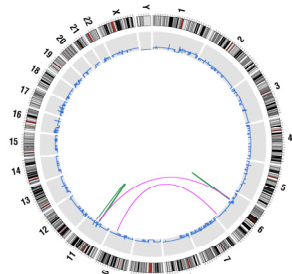

PD3666a

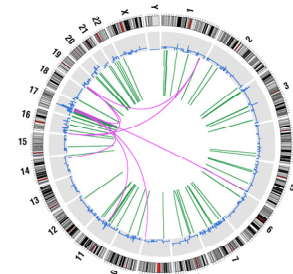

PD3670a

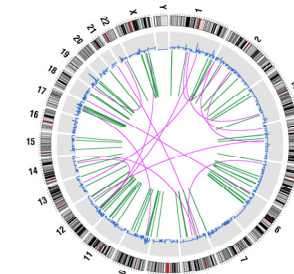

PD3688a

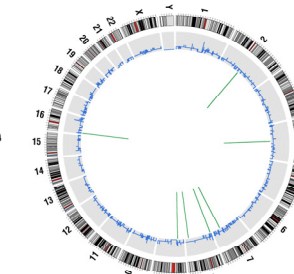

PD3695a

Supplement: NIHMS28075-supplement-3.pdf [file NIHMS28075-supplement-3.pdf]

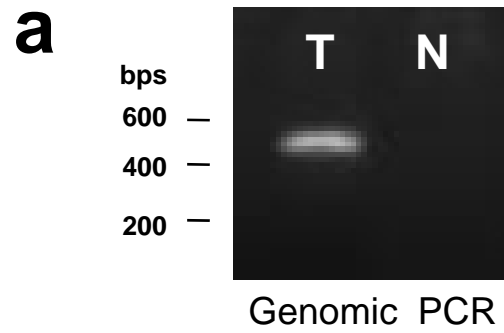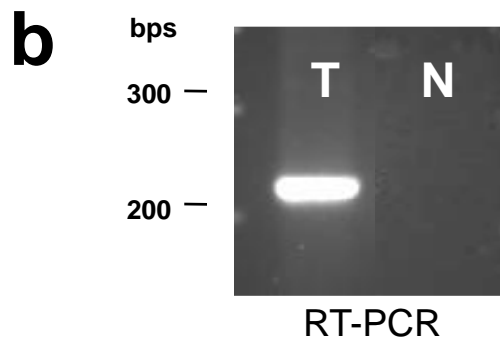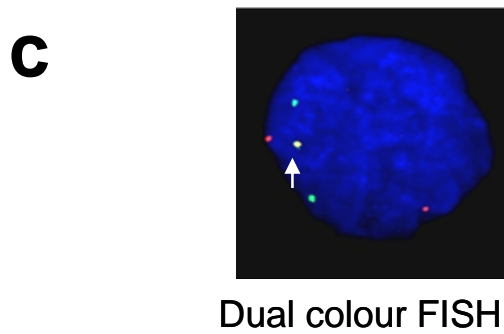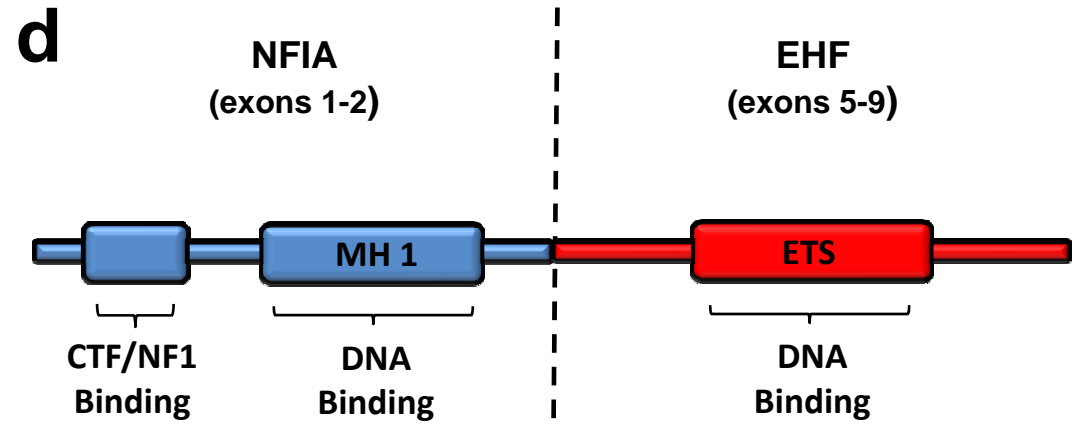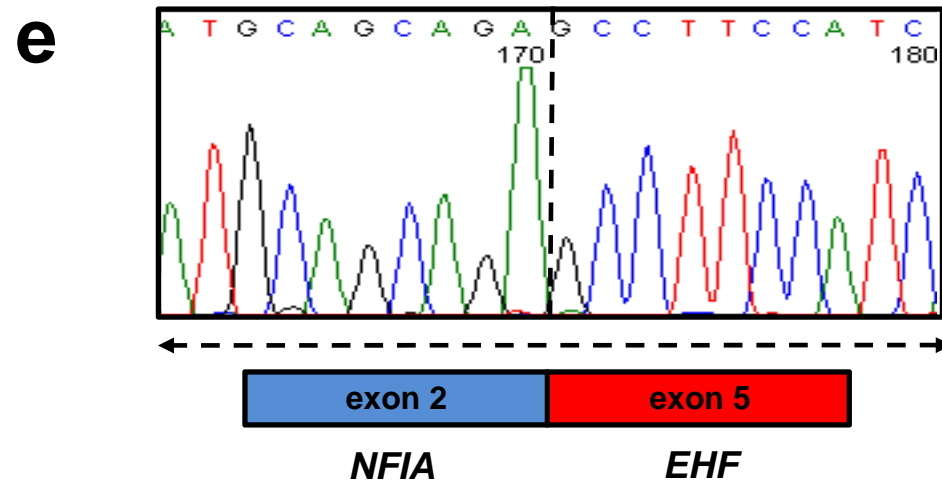

Supplement: NIHMS28075-supplement-4.pdf [file NIHMS28075-supplement-4.pdf]

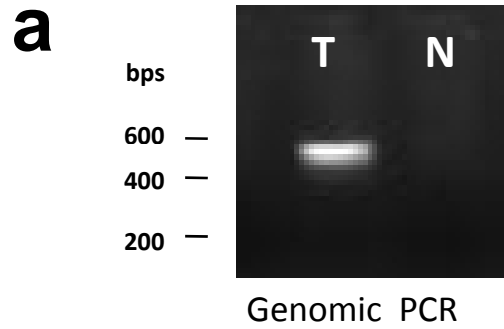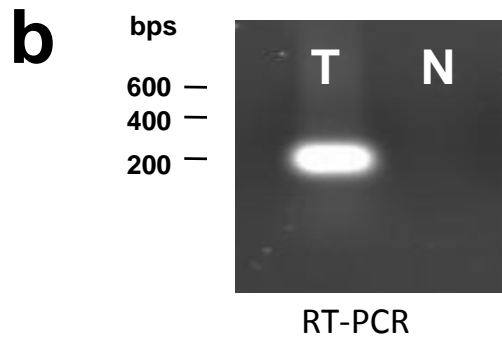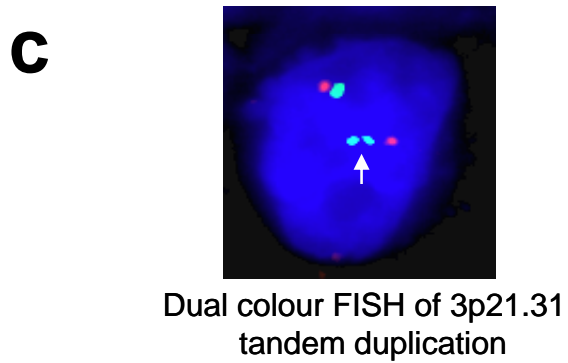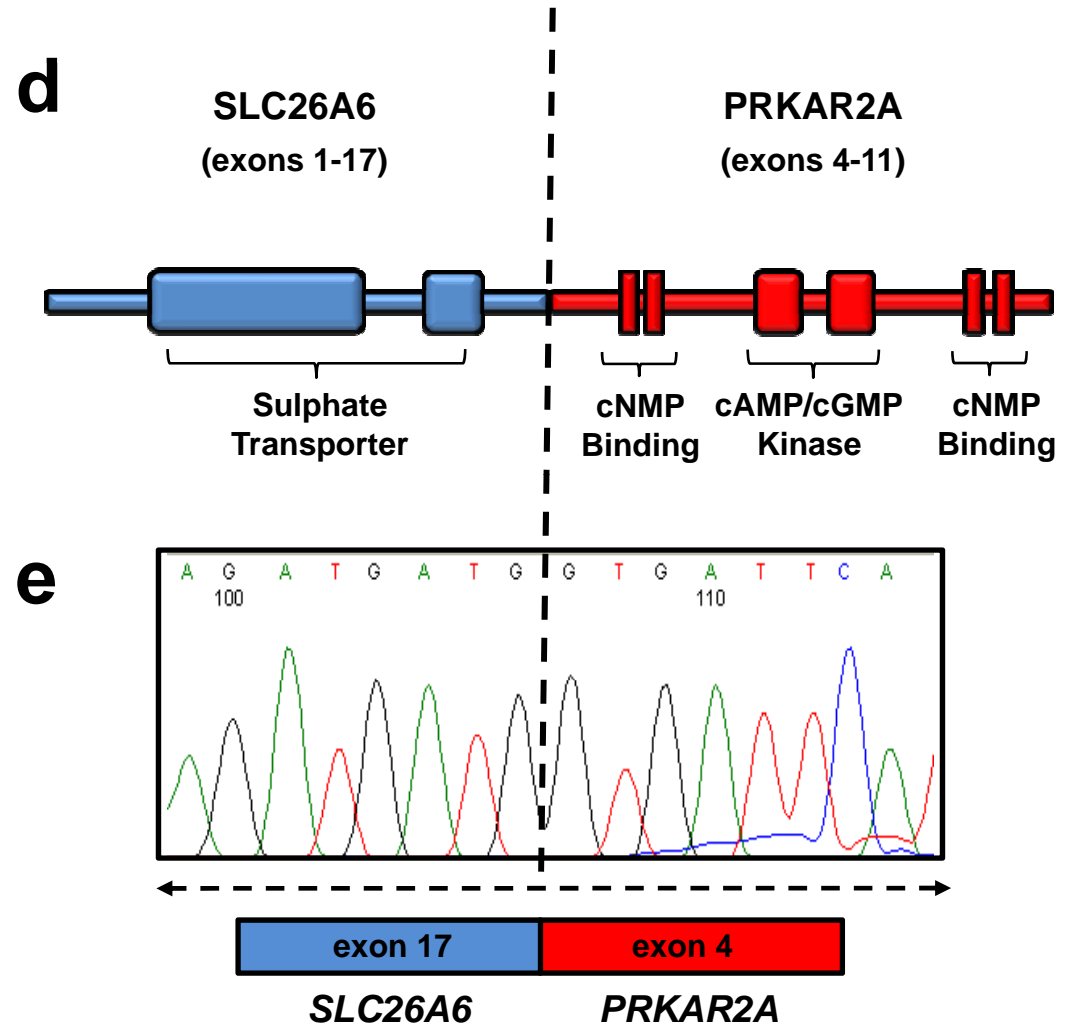

Supplement: NIHMS28075-supplement-5.pdf [file NIHMS28075-supplement-5.pdf]

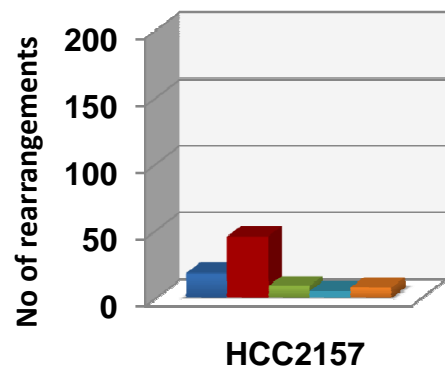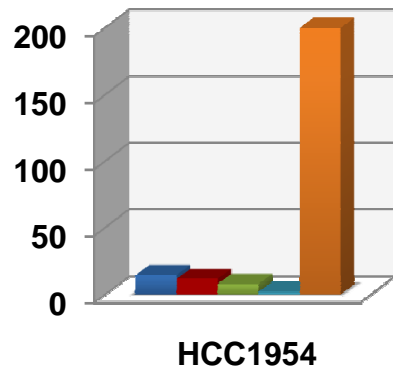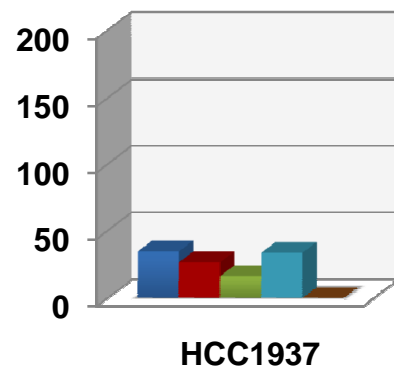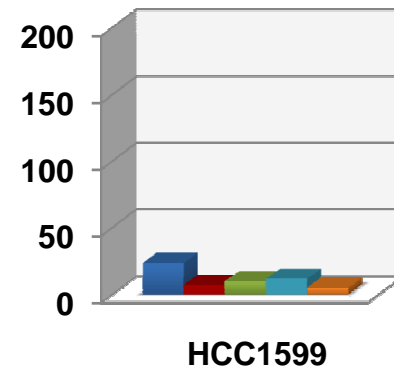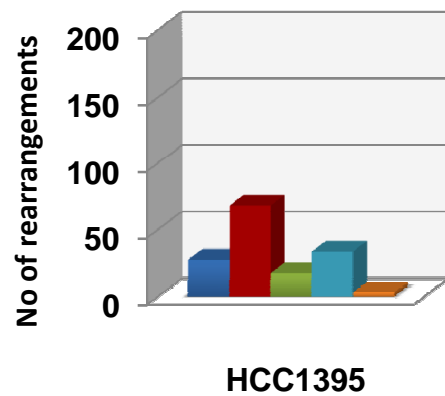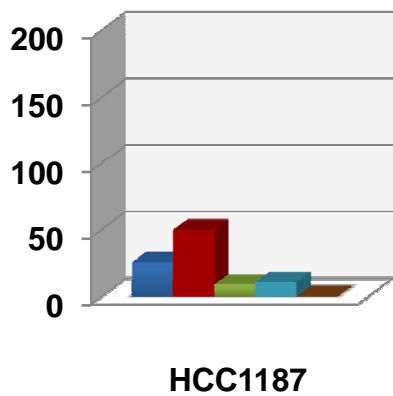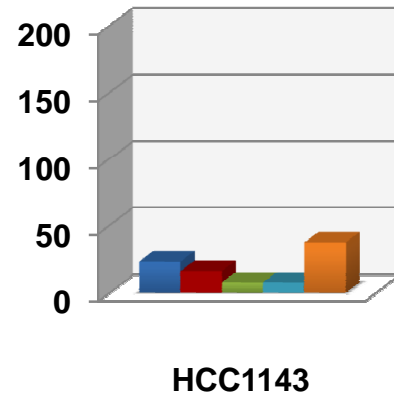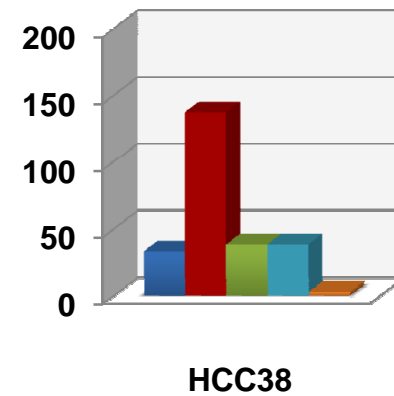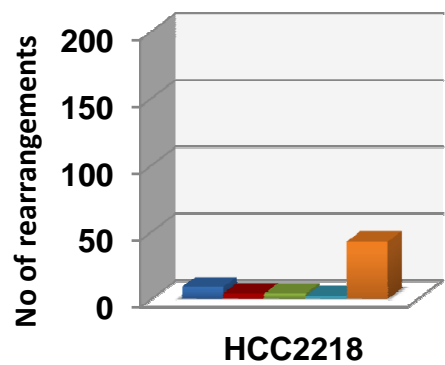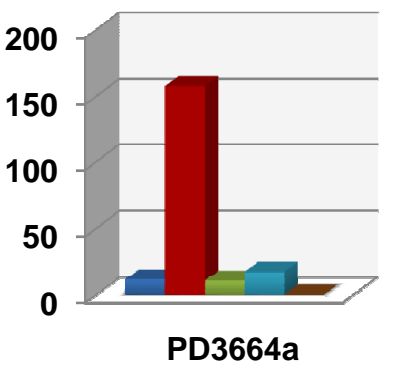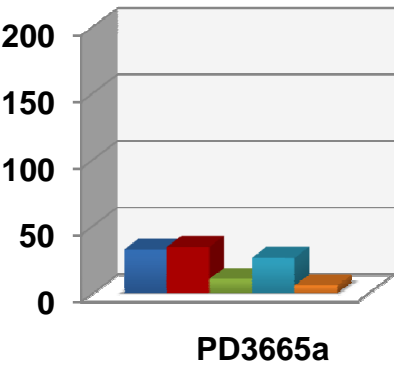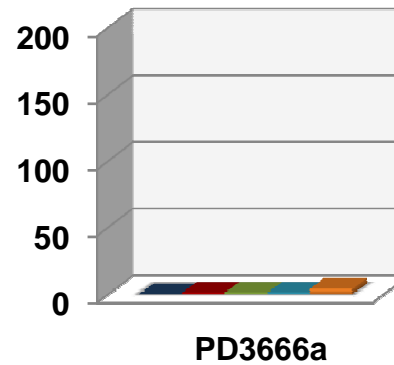

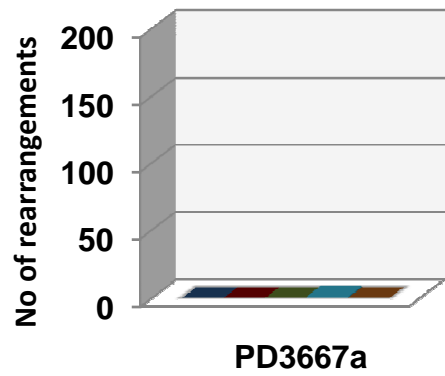

PD3667a

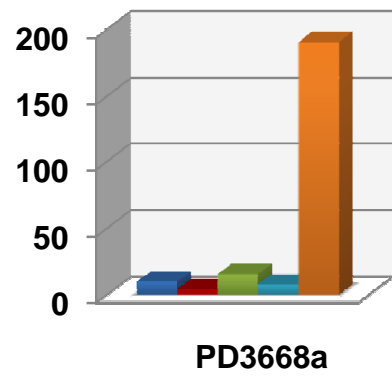

PD3668a

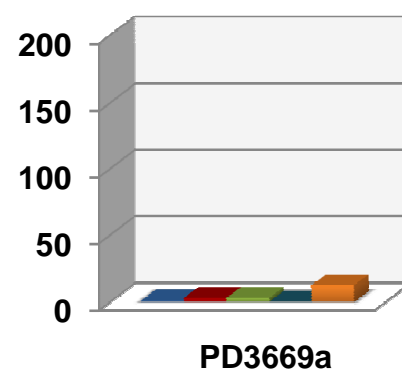

PD3669a

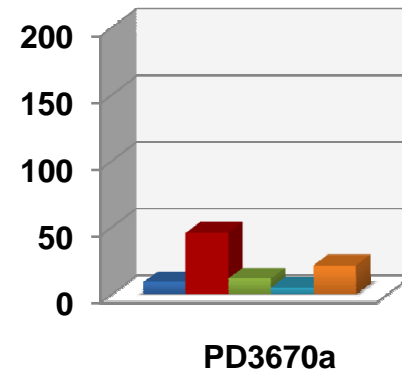

PD3670a

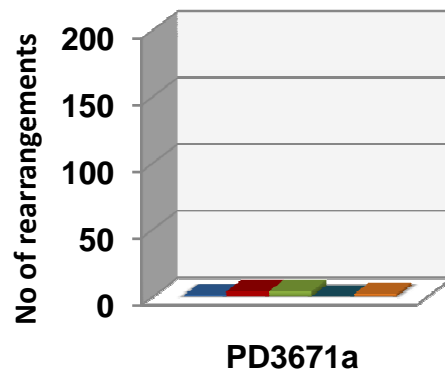

PD3671a

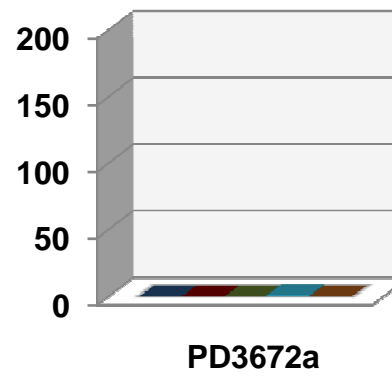

PD3672a

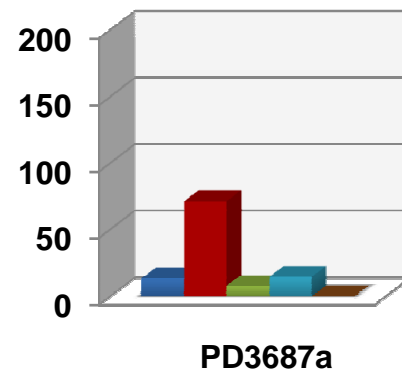

PD3687a

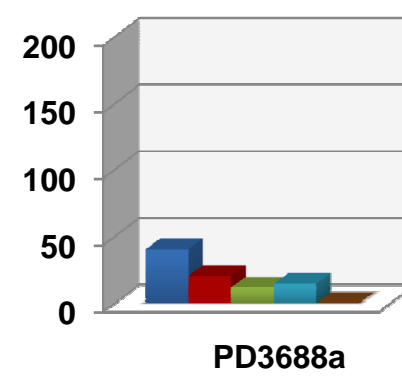

PD3688a

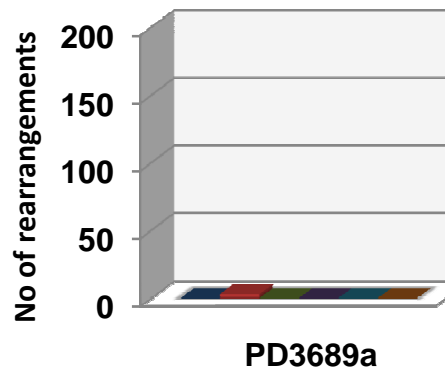

PD3689a

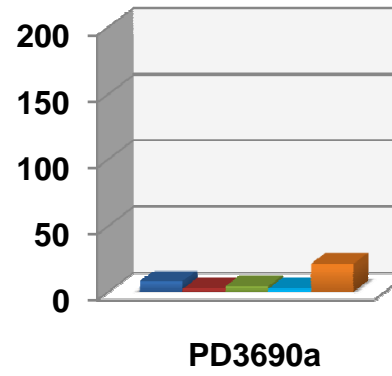

PD3690a

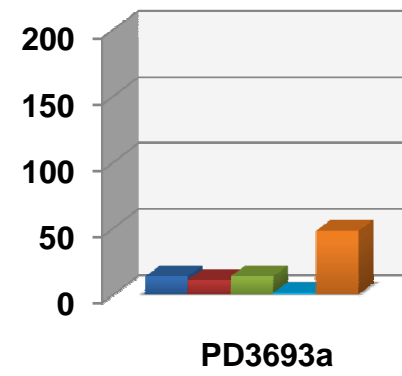

PD3693a

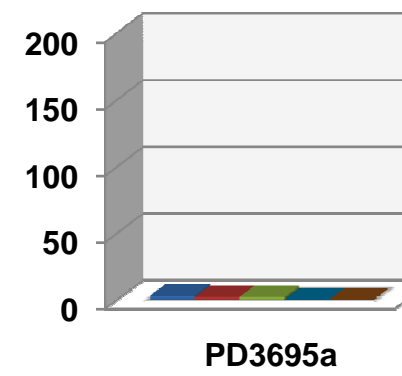

PD3695a

Supplement: NIHMS28075-supplement-6.pdf [file NIHMS28075-supplement-6.pdf]

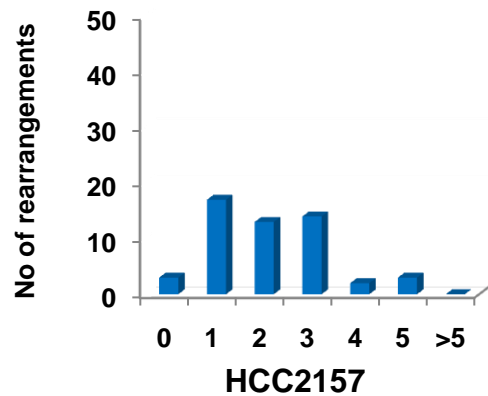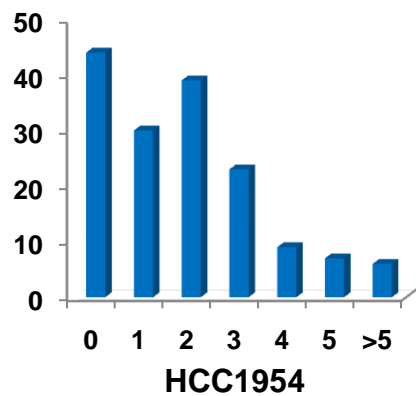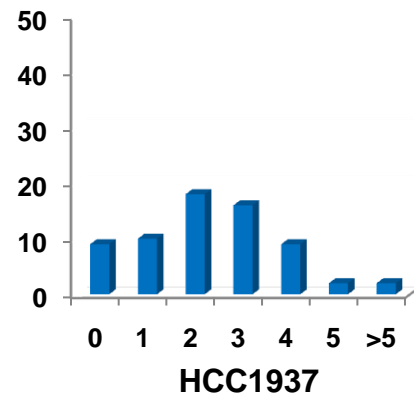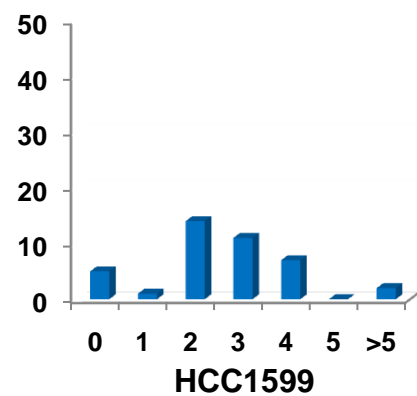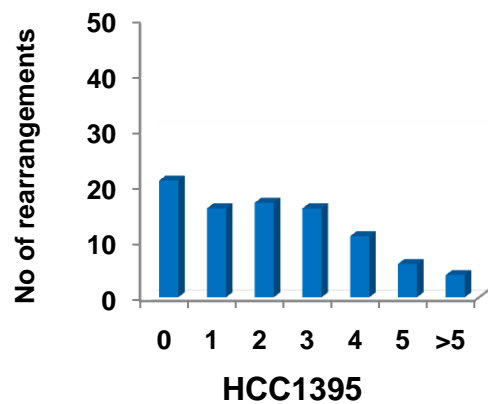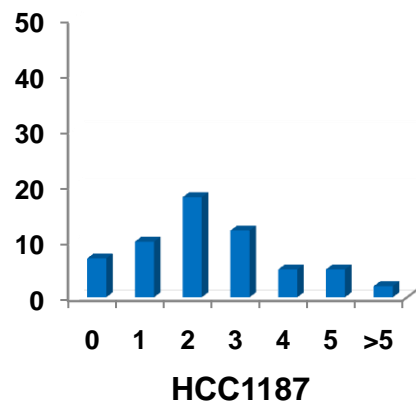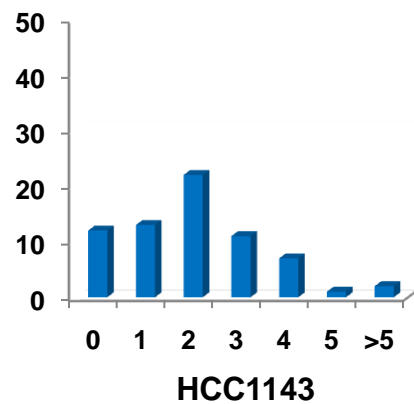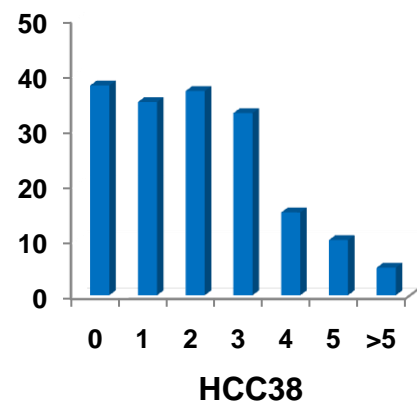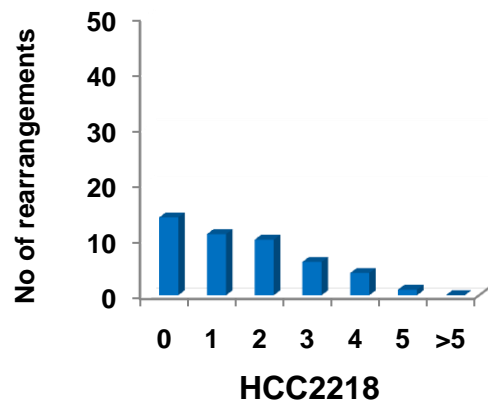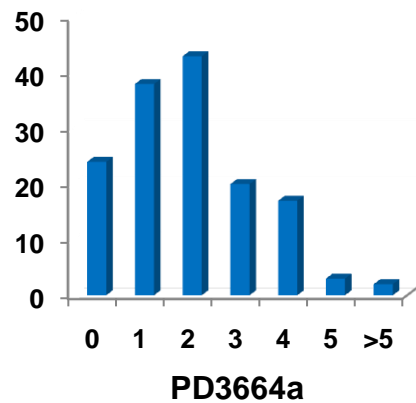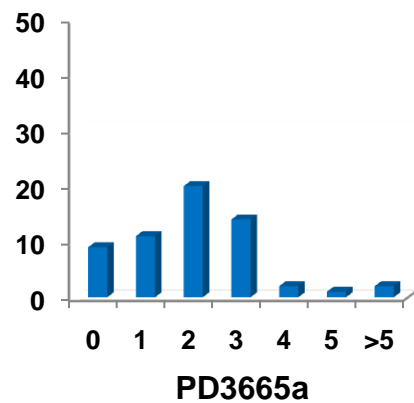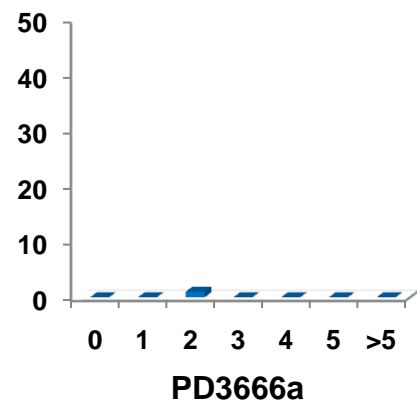

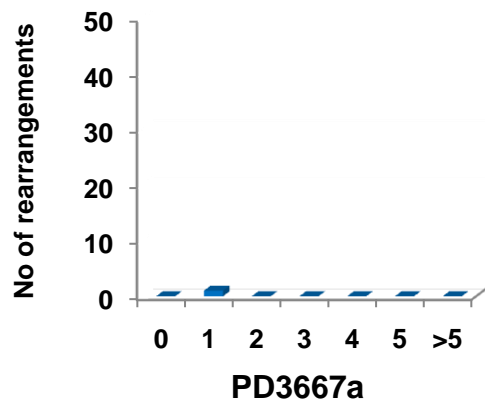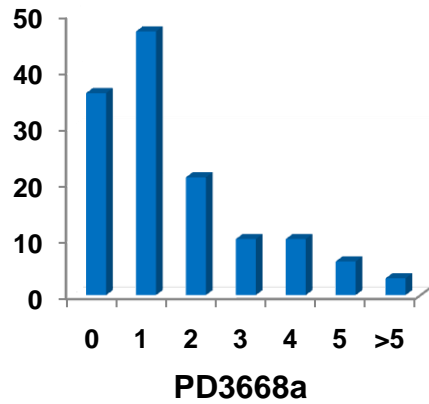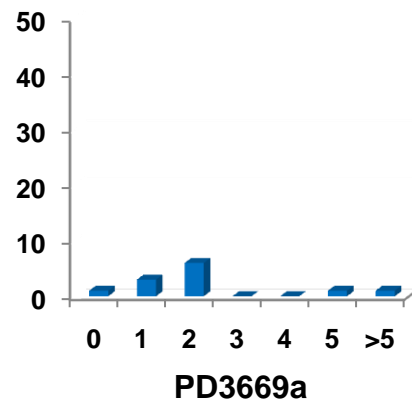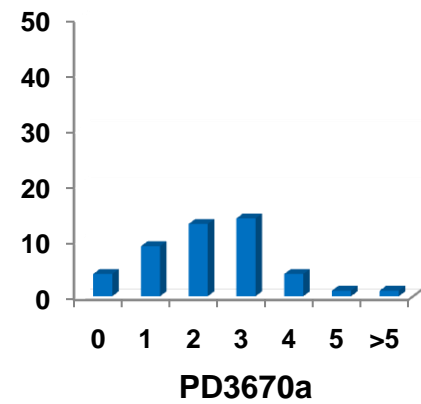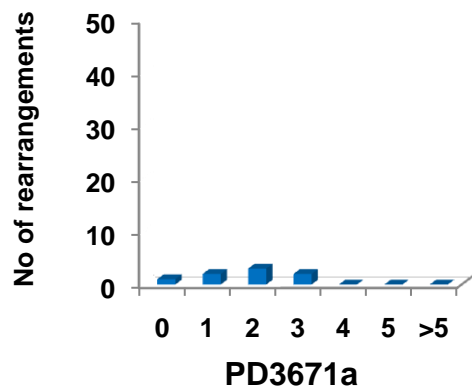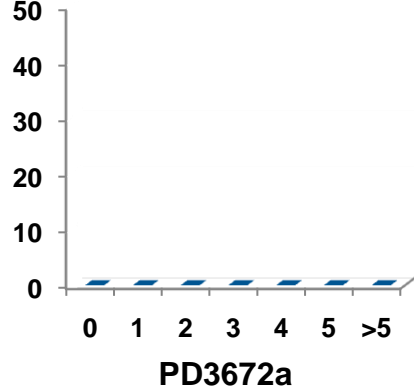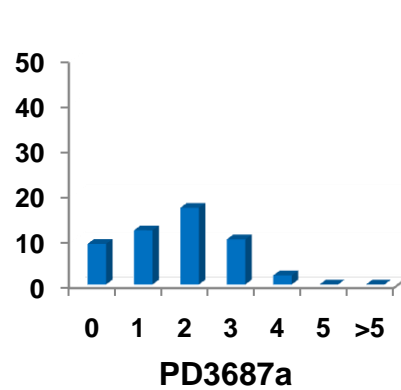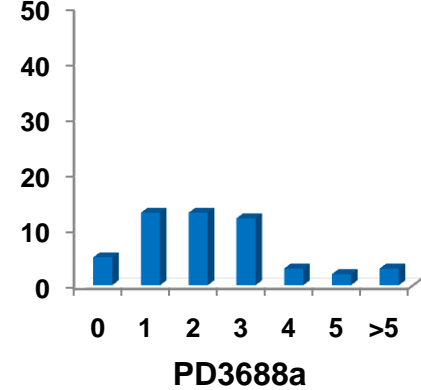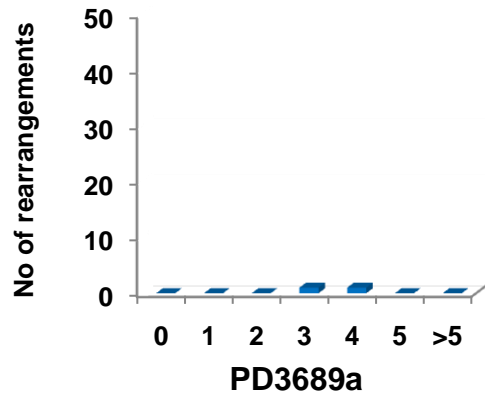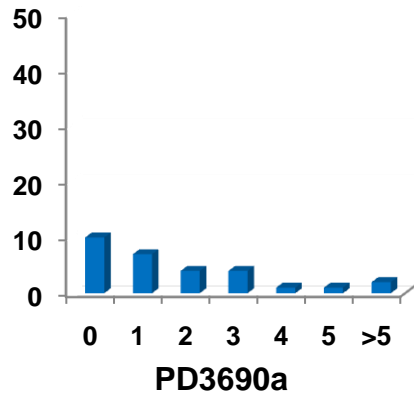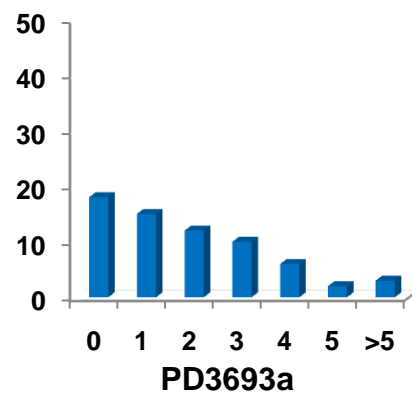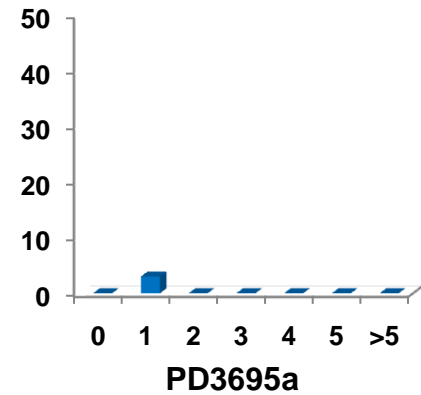

Supplement: NIHMS28075-supplement-7.pdf [file NIHMS28075-supplement-7.pdf]

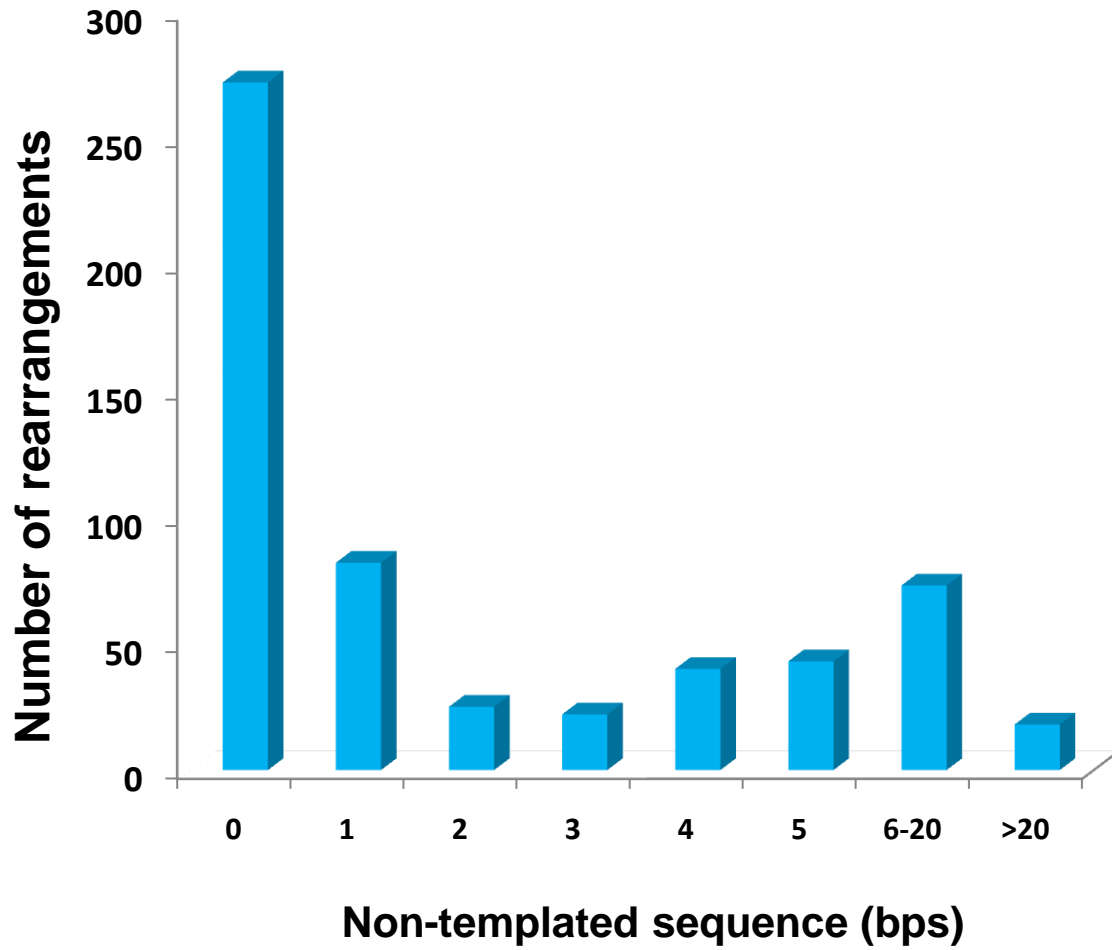

Supplement: NIHMS28075-supplement-8.pdf [file NIHMS28075-supplement-8.pdf]
